# Supplementary figures and images for: Rational Metabolic Engineering of Escherichia Coli for High-yield L-serine Production
Source: Research Square preprint supplement (doi:10.21203/rs.3.rs-105404/v1), 2020-11-17

# Fig. S1: Microscopic observation of SSW-01 and SSW-02


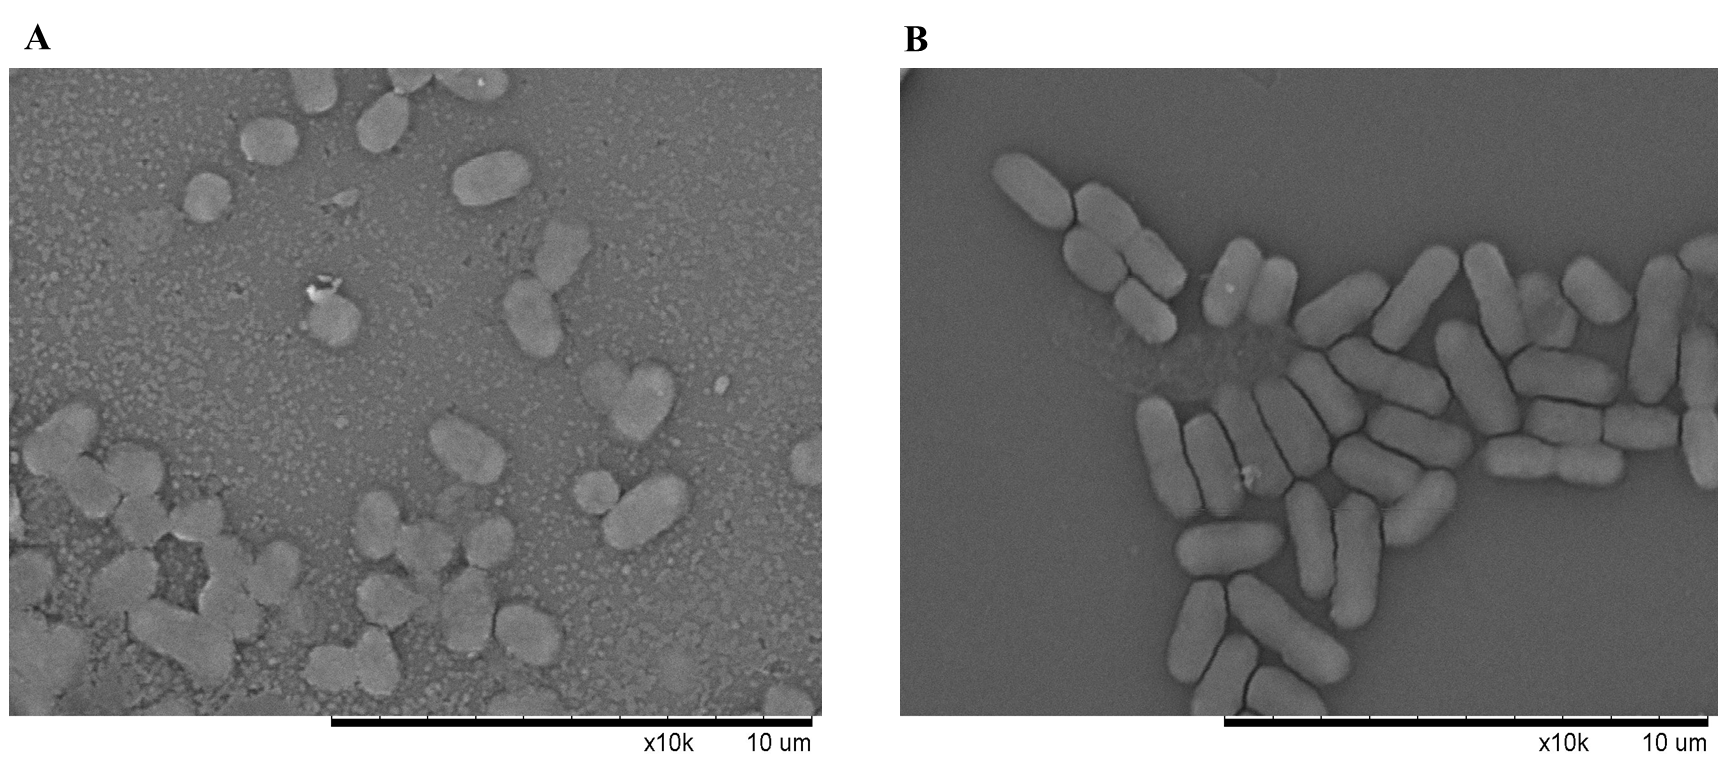
(A) SSW-01 cells were shorter than (B) SSW-02 cells.

Supplement: Supplementary file 1 [file 03fa2a2cde7d7f79ff9cadba.docx]
